# Supplementary material for: Evidence of Transcriptional Shutoff by Pathogenic Viral Haemorrhagic Septicaemia Virus in Rainbow Trout
Source: MDPI journal article supplement (doi:10.3390/v13061129), 2021-06-11

# Evidence of transcriptional shutoff by pathogenic viral haemorrhagic septicaemia virus in rainbow trout

Irene Cano et al.

## Supplemental Material (Tables and Figures)

### Contents

**Table S1.** The number of Illumina read sequences obtained before and after quality-trimming.

**Table S2.** Summary of the rainbow (*Oncorhynchus mykiss*) genes and the nucleotide sequences of the primers and probes used for the Taqman qPCR assays.

**Figure S1.** Comparison of relative gene expression (fold-change) over time (3, 6 and 12 hours post inoculation) of rainbow trout cells (RTG-2) inoculated either with a pathogenic (J167) or a non-pathogenic (1p49) VHSV isolate relative to control cells by Taqman qPCR analysis or Illumina HiSeq sequence analysis.

**Table S1.** The number of Illumina read sequences obtained before and after quality-trimming.

| Sample name             | Isolate                    | hpi | Treatment ID | Replicate ID | Number of raw paired reads | Number of trimmed paired reads | Percentage of reads retained |
|-------------------------|----------------------------|-----|--------------|--------------|----------------------------|--------------------------------|------------------------------|
| CEFASR-0022-control_0_1 | Control                    | 0   | Control      | 1p49_0_1     | 9,028,972                  | 9,007,168                      | 99.8%                        |
| CEFASR-0022-control_0_2 | Control                    | 0   | Control      | 1p49_0_2     | 9,240,202                  | 9,219,625                      | 99.8%                        |
| CEFASR-0022-control_0_3 | Control                    | 0   | Control      | 1p49_0_3     | 9,794,127                  | 9,771,121                      | 99.8%                        |
| CEFASR-0022-1p49_3_1    | Non-pathogenic VHSV (1p49) | 3   | 1p49_3       | 1p49_3_1     | 7,053,150                  | 7,036,131                      | 99.8%                        |
| CEFASR-0022-1p49_3_2    | Non-pathogenic VHSV (1p49) | 3   | 1p49_3       | 1p49_3_2     | 8,785,409                  | 8,765,254                      | 99.8%                        |
| CEFASR-0022-1p49_3_3    | Non-pathogenic VHSV (1p49) | 3   | 1p49_3       | 1p49_3_3     | 9,413,301                  | 9,363,411                      | 99.5%                        |
| CEFASR-0022-1p49_6_1    | Non-pathogenic VHSV (1p49) | 6   | 1p49_6       | 1p49_6_1     | 7,208,349                  | 7,184,677                      | 99.7%                        |
| CEFASR-0022-1p49_6_2    | Non-pathogenic VHSV (1p49) | 6   | 1p49_6       | 1p49_6_2     | 8,836,676                  | 8,816,782                      | 99.8%                        |
| CEFASR-0022-1p49_6_3    | Non-pathogenic VHSV (1p49) | 6   | 1p49_6       | 1p49_6_3     | 10,142,464                 | 10,117,697                     | 99.8%                        |
| CEFASR-0022-1p49_12_1   | Non-pathogenic VHSV (1p49) | 12  | 1p49_12      | 1p49_12_1    | 9,345,943                  | 9,325,192                      | 99.8%                        |
| CEFASR-0022-1p49_12_2   | Non-pathogenic VHSV (1p49) | 12  | 1p49_12      | 1p49_12_2    | 8,415,353                  | 8,397,070                      | 99.8%                        |
| CEFASR-0022-1p49_12_3   | Non-pathogenic VHSV (1p49) | 12  | 1p49_12      | 1p49_12_3    | 10,344,724                 | 10,320,731                     | 99.8%                        |
| CEFASR-0022-J167_3_1    | Pathogenic VHSV (J167)     | 3   | J167_3       | J167_3_1     | 8,782,662                  | 8,765,137                      | 99.8%                        |
| CEFASR-0022-J167_3_2    | Pathogenic VHSV (J167)     | 3   | J167_3       | J167_3_2     | 9,998,149                  | 9,955,306                      | 99.6%                        |
| CEFASR-0022-J167_3_3    | Pathogenic VHSV (J167)     | 3   | J167_3       | J167_3_3     | 8,498,150                  | 8,443,376                      | 99.4%                        |
| CEFASR-0022-J167_6_1    | Pathogenic VHSV (J167)     | 6   | J167_6       | J167_6_1     | 10,640,588                 | 10,489,167                     | 98.6%                        |
| CEFASR-0022-J167_6_2    | Pathogenic VHSV (J167)     | 6   | J167_6       | J167_6_2     | 10,856,233                 | 10,717,483                     | 98.7%                        |
| CEFASR-0022-J167_6_3    | Pathogenic VHSV (J167)     | 6   | J167_6       | J167_6_3     | 8,356,069                  | 8,330,423                      | 99.7%                        |
| CEFASR-0022-J167_12_1   | Pathogenic VHSV (J167)     | 12  | J167_12      | J167_12_1    | 7,845,417                  | 7,825,015                      | 99.7%                        |
| CEFASR-0022-J167_12_2   | Pathogenic VHSV (J167)     | 12  | J167_12      | J167_12_2    | 8,388,979                  | 8,372,225                      | 99.8%                        |
| CEFASR-0022-J167_12_3   | Pathogenic VHSV (J167)     | 12  | J167_12      | J167_12_3    | 8,178,876                  | 8,160,335                      | 99.8%                        |

**Table S2.** Summary of the rainbow (*Oncorhynchus mykiss*) genes and the nucleotide sequences of the primers and probes used for the Taqman qPCR assays. *Beta-actin* was used as reference gene for normalization purposes. PCR efficiency was calculated using the formula: Efficiency =  $-1 + 10^{(-1/\text{slope})}$ .

| Genbank Accession | Gene name                                  | Gene symbol    | Forward primer / Reverse primer                | Probe Fam 5' - MGB 3' | PCR efficiency | Notes                                       |
|-------------------|--------------------------------------------|----------------|------------------------------------------------|-----------------------|----------------|---------------------------------------------|
| AJ438158.1        | <i>Beta-actin</i>                          | <i>actb</i>    | GAAATCGCCGCACTGGTT /<br>CGGCGAATCCGGCTTT       | TTGACAACGGATCCGGT     | 103%           | Reference gene                              |
| XM_021610144.1    | <i>Adiponectin receptor protein 1-like</i> | <i>adipor1</i> | CCCTCCAGAGCTTCCCAAA /<br>CCCGGACCCTTTCTATCACA  | CAAGCTGTAGGAGGCTT     | 103%           | Cell membrane receptor                      |
| XM_021586448.1    | <i>Serum amyloid A-5 protein-like</i>      | <i>saa</i>     | GTACCGCTTCCCTGGTGAAG /<br>CCGTATGCACGCCACATGT  | TGCTCGAGGTGCTAGA      | 89%            | Acute phase response                        |
| XM_021602847.1    | <i>Heat shock protein 30-like</i>          | <i>hsp30</i>   | CACCTGCTCCCTGGCTCAT /<br>ATGGATTCTTTGGTGCCTGAA | ACGGGAAGCTCCAC        | 98%            | Cellular stress                             |
| XM_021597368.1    | <i>Band 4.1-like protein 5</i>             | <i>epb41l5</i> | CGGCCCGGTCCAGAAG /<br>CACTGTAGCGGAAGCGTGATC    | CAGCACGCTCTGGGT       | 93%            | Cytoskeletal protein binding                |
| NM_001124633.1    | <i>CD209 molecule</i>                      | <i>cd209</i>   | CCTTACCATCCTGCACAGCAA /<br>CCTCCGGGCCTCTTTTTC  | AAACAGCATGACGCTCT     | 96%            | C-type lectin receptor/pathogen recognition |

**Figure S1.** Comparison of relative gene expression (fold-change) over time (3, 6 and 12 hours post inoculation) of rainbow trout cells (RTG-2) inoculated either with a pathogenic (J167) or a non-pathogenic (1p49) VHSV isolate, relative to control cells, by Taqman qPCR analysis or Illumina HiSeq sequence analysis. Taqman qPCR data is expressed as average gene relative transcription of three replicates  $\pm$  95% confident interval (CI). a) Adiponectin receptor protein 1-like (*adipor1*); b) Heat shock protein 30-like (*hsp30*); c) CD209 molecule (*cd209*); d) Serum amyloid A-5 protein-like (*saa*); and e) Band 4.1-like protein 5 (*epb41l5*). (\*) represents significant differences ( $P \leq 0.05$ ) between groups at the same time post inoculation. Illumina sequencing data was extracted from Data Set 2 in the supplemental material.

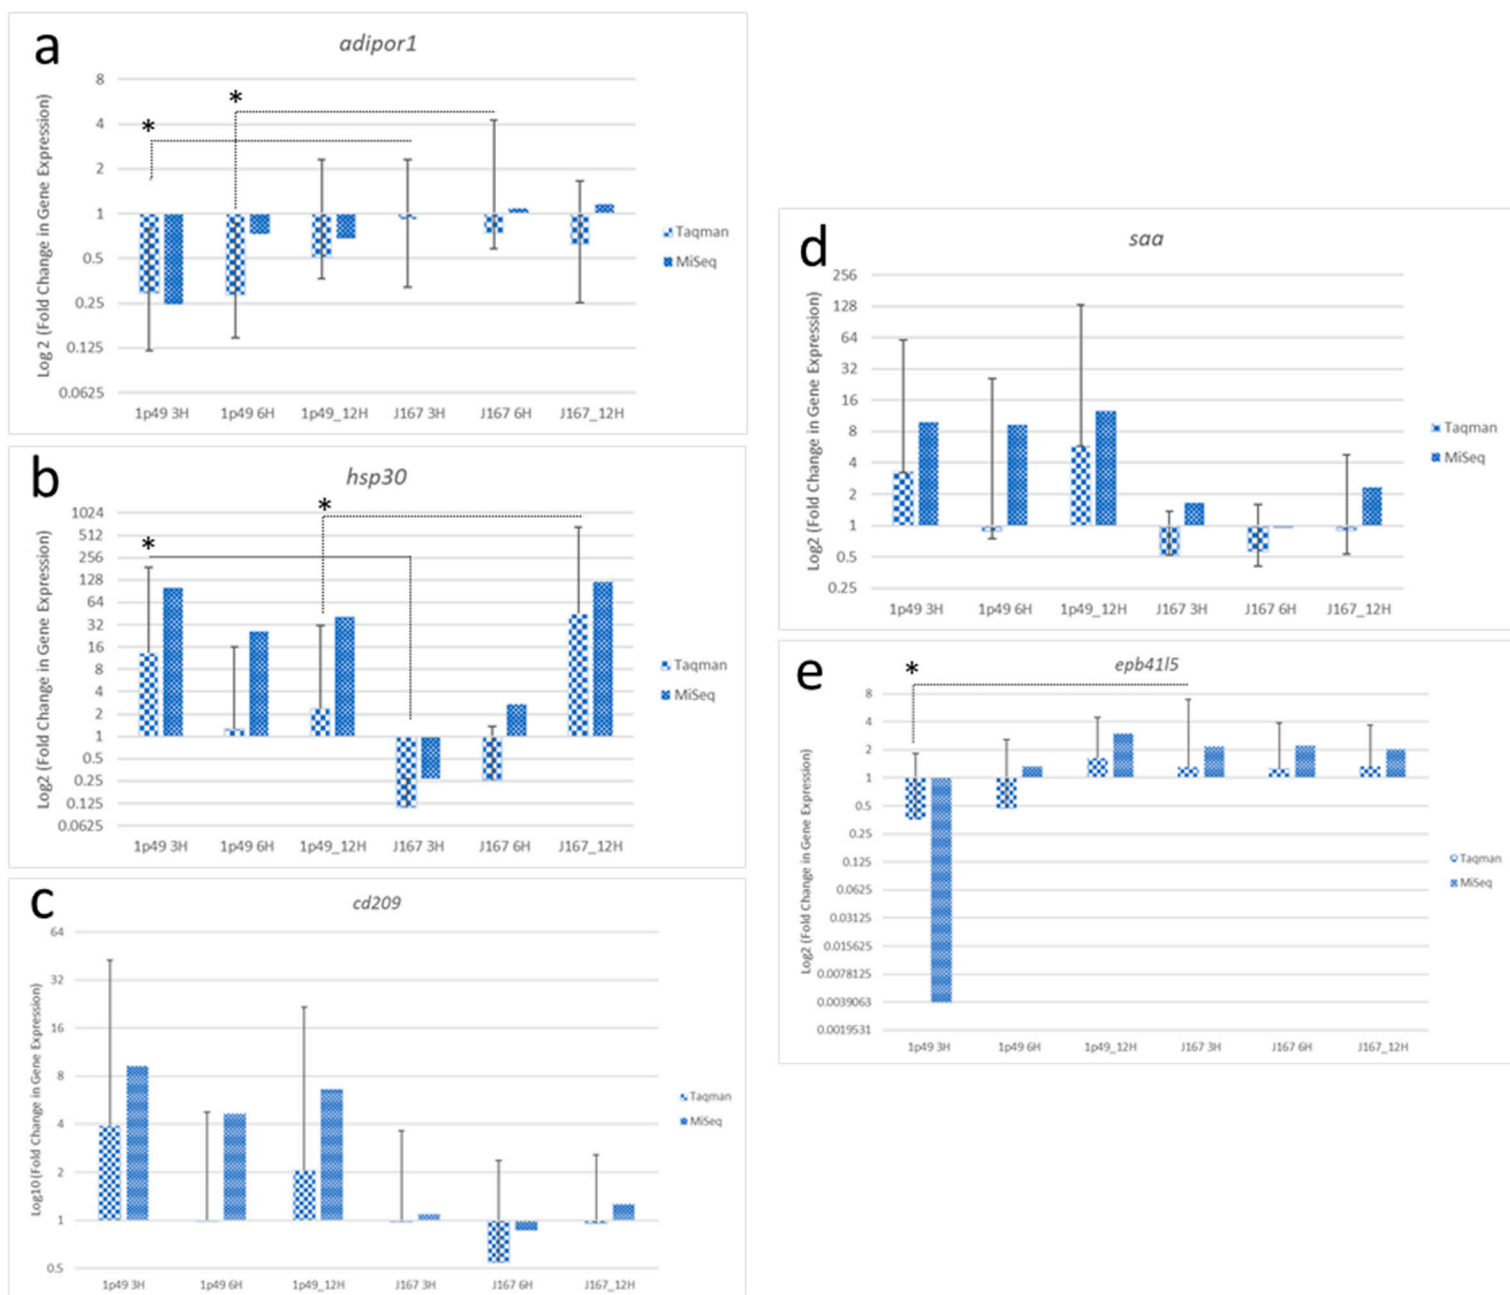

Supplement: s1 [file s1]
